# Supplementary material for: Occult Non-Small Cell Lung Cancer: An Underappreciated Disease
Source: MDPI journal article supplement (doi:10.3390/jcm11051399), 2022-03-03
Supplement: s1 [file s1]

## FIGURE LEGEND

**Figure S1.** The cancer specific survival comparisons. Occult NSCLC vs. other NSCLC (**A**) and occult NSCLC vs. T1 stage NSCLC vs. T2 stage NSCLC vs. T3 stage NSCLC vs. T4 stage NSCLC (**B**). NSCLC, non-small cell lung cancer

**Figure S2.** The cancer specific survival comparisons. Low-risk occult NSCLC vs. High-risk occult NSCLC (**A**) and Low-risk occult NSCLC vs. High-risk occult NSCLC vs. T1 stage NSCLC vs. T2 stage NSCLC vs. T3 stage NSCLC vs. T4 stage NSCLC (**B**). NSCLC, non-small cell lung cancer

**Figure S3.** The cancer specific survival comparisons. Occult NSCLC with surgery vs. occult NSCLC without surgery vs. other NSCLC with surgery vs. other NSCLC without surgery. NSCLC, non-small cell lung cancer
